# Supplementary material
Source: PubMed Central journal article supplement (PMC9617780)
Supplement: NIHMS1837980-supplement-supplementary_material.pdf [file NIHMS1837980-supplement-supplementary_material.pdf]

# Supplemental Material S1 Text of maternal questionnaire and medical record abstraction regarding drug use

## Maternal Questionnaire

53. Did you or have you taken any street drugs during your pregnancy? (this information will be kept strictly confidential)

- (a) No
- (b) Yes

54. If yes, what street drugs did you take while pregnant? (circle all that apply)

- (a) Marijuana (weed)
- (b) Cocaine (crack)
- (c) Heroin
- (d) Methamphetamine (meth)
- (e) Ecstasy
- (f) Other, specify \_\_\_\_\_

## Medical Record Abstraction

21. Used "street drugs" at any time in pregnancy

Specify codes for up to three drugs a) \_\_, b) \_\_, c) \_\_  
(code 0 for 21a if none)

- 0. None
- 1. Heroin
- 2. Cocaine
- 3. Marijuana
- 4. Phencyclidine
- 5. Lysergic acid diethylamide
- 6. Speed
- 7. Crack
- 8. Barbiturates
- 9. Ecstasy
- 10. OxyContin
- 11. Methadone
- 12. Suboxone

77. Used street drugs but type unknown

99. Records missing
